# Supplementary material
Source: Springer Nature journal article supplement (https://www.springermedizin.de/resource/supplementary/12887_2013_953_MOESM5_ESM.pdf/9476876)

**Figure 5: National trend for underweight compared to separate trends for boys and girls**

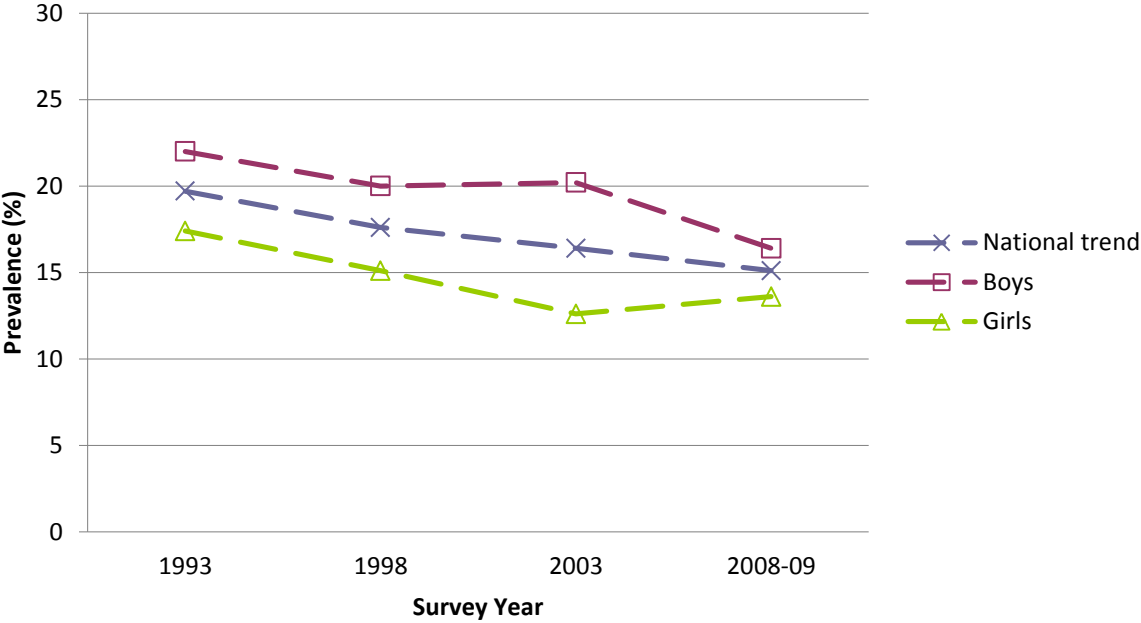

Supplement: MOESM5 [file 9476876]
